# Supplementary material
Source: publisher figshare collection journal article supplement (https://acs.figshare.com/ndownloader/files/4496149)
Supplement: Supplementary file 1 [file 4496149]

 data_global
_journal_name_full               ?
_journal_coden_cambridge         ?

loop_
_publ_contact_author_name
'David G Churchill'
'Snehadrinarayan Khatua'
_publ_contact_author_address     
;
Molecular Logic Gate Lab
Department of Chemistry
Korean Advanced Institute of Science & Technology
Republic of Korea
;
_publ_contact_author_email      'dchurchill@kaist.ac.kr','s.khatua@kaist.ac.kr'
loop_
_publ_author_name
Snehadrinarayan Khatua
David G Churchill 
 
data_chu30-01
 
_audit_creation_method            SHELXL-97
_chemical_name_systematic
;
 ?
;
_chemical_name_common             ?
_chemical_melting_point           ?
_chemical_formula_moiety          ?
_chemical_formula_sum            'C15 H29 N2 Cu O9.50'
_chemical_formula_weight          452.94
 
loop_
 _atom_type_symbol
 _atom_type_description
 _atom_type_scat_dispersion_real
 _atom_type_scat_dispersion_imag
 _atom_type_scat_source
 'C'  'C'   0.0033   0.0016
 'International Tables Vol C Tables 4.2.6.8 and 6.1.1.4'
 'H'  'H'   0.0000   0.0000
 'International Tables Vol C Tables 4.2.6.8 and 6.1.1.4'
 'Cu'  'Cu'   0.3201   1.2651
 'International Tables Vol C Tables 4.2.6.8 and 6.1.1.4'
 'N'  'N'   0.0061   0.0033
 'International Tables Vol C Tables 4.2.6.8 and 6.1.1.4'
 'O'  'O'   0.0106   0.0060
 'International Tables Vol C Tables 4.2.6.8 and 6.1.1.4'
 
_symmetry_cell_setting            Triclinic
_symmetry_space_group_name_H-M    P-1
 
loop_
 _symmetry_equiv_pos_as_xyz
 'x, y, z'
 '-x, -y, -z'
 
_cell_length_a                    7.9865(12)
_cell_length_b                    10.4948(16)
_cell_length_c                    13.6062(19)
_cell_angle_alpha                 75.048(7)
_cell_angle_beta                  84.279(7)
_cell_angle_gamma                 70.711(7)
_cell_volume                      1039.8(3)
_cell_formula_units_Z             2
_cell_measurement_temperature     293(2)
_cell_measurement_reflns_used     7293
_cell_measurement_theta_min       1.55
_cell_measurement_theta_max       32.47
 
_exptl_crystal_description        'block'
_exptl_crystal_colour             'purple'
_exptl_crystal_size_max           0.20
_exptl_crystal_size_mid           0.20
_exptl_crystal_size_min           0.10
_exptl_crystal_density_meas       ?
_exptl_crystal_density_diffrn     1.447
_exptl_crystal_density_method     'not measured'
_exptl_crystal_F_000              476
_exptl_absorpt_coefficient_mu     1.100
_exptl_absorpt_correction_type    'empirical'
_exptl_absorpt_correction_T_min   0.8100
_exptl_absorpt_correction_T_max   0.8980
_exptl_absorpt_process_details    'SADABS'
 
_exptl_special_details
;
 ?
;
 
_diffrn_ambient_temperature       293(2)
_diffrn_radiation_wavelength      0.71073
_diffrn_radiation_type            MoK\a
_diffrn_radiation_source          'fine-focus sealed tube'
_diffrn_radiation_monochromator   graphite
_diffrn_measurement_device_type   'CCD area detector'
_diffrn_measurement_method        'phi and omega scans'
_diffrn_detector_area_resol_mean  ?
_diffrn_standards_number          ?
_diffrn_standards_interval_count  ?
_diffrn_standards_interval_time   ?
_diffrn_standards_decay_%         ?
_diffrn_reflns_number             18267
_diffrn_reflns_av_R_equivalents   0.0383
_diffrn_reflns_av_sigmaI/netI     0.0522
_diffrn_reflns_limit_h_min        -12
_diffrn_reflns_limit_h_max        11
_diffrn_reflns_limit_k_min        -15
_diffrn_reflns_limit_k_max        15
_diffrn_reflns_limit_l_min        -20
_diffrn_reflns_limit_l_max        19
_diffrn_reflns_theta_min          1.55
_diffrn_reflns_theta_max          32.47
_reflns_number_total              7293
_reflns_number_gt                 4868
_reflns_threshold_expression      >2\s(I)
 
_computing_data_collection        'Bruker APEX II'
_computing_cell_refinement        'Bruker APEX II'
_computing_data_reduction         'Bruker APEX II'
_computing_structure_solution     'SHELXS-97 (Sheldrick, 1990)'
_computing_structure_refinement   'SHELXL-97 (Sheldrick, 2008)'
_computing_molecular_graphics     'ORTEP3'
_computing_publication_material   'Bruker SHELXTL' 
 
_refine_special_details
;
 Refinement of F^2^ against ALL reflections.  The weighted R-factor wR and
 goodness of fit S are based on F^2^, conventional R-factors R are based
 on F, with F set to zero for negative F^2^. The threshold expression of
 F^2^ > 2\s(F^2^) is used only for calculating R-factors(gt) etc. and is
 not relevant to the choice of reflections for refinement.  R-factors based
 on F^2^ are statistically about twice as large as those based on F, and R-
 factors based on ALL data will be even larger.
;
 
_refine_ls_structure_factor_coef  Fsqd
_refine_ls_matrix_type            full
_refine_ls_weighting_scheme       calc
_refine_ls_weighting_details
; calc
 [0.00000+1.00000exp(0.13(sin\q/\l)^2^)]/
   [\s^2^(Fo^2^)+0.0679+0.1325*P+(0.0792P)^2^+0.0727sin\q/\l]
 where P = -0.01446Fo^2^ + 1.01446Fc^2^
;
_atom_sites_solution_primary      direct
_atom_sites_solution_secondary    difmap
_atom_sites_solution_hydrogens    geom
_refine_ls_hydrogen_treatment     mixed
_refine_ls_extinction_method      none
_refine_ls_extinction_coef        ?
_refine_ls_number_reflns          7293
_refine_ls_number_parameters      266
_refine_ls_number_restraints      0
_refine_ls_R_factor_all           0.0826
_refine_ls_R_factor_gt            0.0464
_refine_ls_wR_factor_ref          0.1452
_refine_ls_wR_factor_gt           0.1264
_refine_ls_goodness_of_fit_ref    1.029
_refine_ls_restrained_S_all       1.029
_refine_ls_shift/su_max           0.001
_refine_ls_shift/su_mean          0.000
 
loop_
 _atom_site_label
 _atom_site_type_symbol
 _atom_site_fract_x
 _atom_site_fract_y
 _atom_site_fract_z
 _atom_site_U_iso_or_equiv
 _atom_site_adp_type
 _atom_site_occupancy
 _atom_site_symmetry_multiplicity
 _atom_site_calc_flag
 _atom_site_refinement_flags
 _atom_site_disorder_assembly
 _atom_site_disorder_group
C1 C 0.7622(3) 1.1248(3) 0.54986(17) 0.0435(5) Uani 1 1 d . . .
C2 C 0.6617(4) 1.2517(3) 0.4862(2) 0.0600(7) Uani 1 1 d . . .
H2 H 0.6507 1.3351 0.5023 0.072 Uiso 1 1 calc R . .
C3 C 0.5798(4) 1.2540(4) 0.4010(2) 0.0636(8) Uani 1 1 d . . .
H3 H 0.5140 1.3388 0.3607 0.076 Uiso 1 1 calc R . .
C4 C 0.5940(4) 1.1325(4) 0.3745(2) 0.0619(8) Uani 1 1 d . . .
H4 H 0.5392 1.1355 0.3164 0.074 Uiso 1 1 calc R . .
C5 C 0.6888(3) 1.0082(3) 0.43388(17) 0.0507(6) Uani 1 1 d . . .
H5 H 0.6980 0.9263 0.4161 0.061 Uiso 1 1 calc R . .
C6 C 0.7740(3) 1.0020(3) 0.52290(16) 0.0399(5) Uani 1 1 d . . .
C7 C 0.8635(3) 0.8647(2) 0.58326(16) 0.0375(4) Uani 1 1 d . . .
H7 H 0.8646 0.7888 0.5596 0.045 Uiso 1 1 calc R . .
C8 C 1.0204(3) 0.6953(2) 0.72469(15) 0.0346(4) Uani 1 1 d . . .
H8 H 1.0889 0.6394 0.6779 0.042 Uiso 1 1 calc R . .
C9 C 1.1449(3) 0.6938(2) 0.80402(16) 0.0375(5) Uani 1 1 d . . .
C10 C 0.8775(3) 0.6328(2) 0.77857(17) 0.0383(4) Uani 1 1 d . . .
H10A H 0.8018 0.6314 0.7276 0.046 Uiso 1 1 calc R . .
H10B H 0.9348 0.5372 0.8143 0.046 Uiso 1 1 calc R . .
C11 C 0.7618(3) 0.7105(3) 0.85419(17) 0.0402(5) Uani 1 1 d . . .
H11A H 0.8367 0.7151 0.9042 0.048 Uiso 1 1 calc R . .
H11B H 0.6991 0.8049 0.8185 0.048 Uiso 1 1 calc R . .
C12 C 0.6278(3) 0.6400(3) 0.90837(19) 0.0451(5) Uani 1 1 d . . .
H12A H 0.5535 0.6361 0.8578 0.054 Uiso 1 1 calc R . .
H12B H 0.6916 0.5452 0.9426 0.054 Uiso 1 1 calc R . .
C13 C 0.5102(3) 0.7110(3) 0.98521(19) 0.0497(6) Uani 1 1 d . . .
H13A H 0.4484 0.6495 1.0262 0.060 Uiso 1 1 calc R . .
H13B H 0.5838 0.7273 1.0302 0.060 Uiso 1 1 calc R . .
C14 C 0.9634(3) 1.1261(2) 0.86252(16) 0.0381(4) Uani 1 1 d . . .
C15 C 1.0105(4) 1.2194(3) 0.9151(2) 0.0542(6) Uani 1 1 d . . .
H15A H 0.9113 1.3022 0.9131 0.081 Uiso 1 1 calc R . .
H15B H 1.1107 1.2439 0.8810 0.081 Uiso 1 1 calc R . .
H15C H 1.0395 1.1715 0.9846 0.081 Uiso 1 1 calc R . .
Cu1 Cu 0.98735(3) 0.97525(3) 0.723038(19) 0.03523(10) Uani 1 1 d . . .
N1 N 0.9415(2) 0.84026(19) 0.66724(13) 0.0332(3) Uani 1 1 d . . .
N2 N 0.3768(3) 0.8463(2) 0.93757(17) 0.0428(4) Uani 1 1 d . . .
O1 O 0.8399(3) 1.12964(18) 0.62971(14) 0.0491(4) Uani 1 1 d . . .
O2 O 1.1364(2) 0.81165(18) 0.81787(12) 0.0405(3) Uani 1 1 d . . .
O1W O 0.7199(4) 1.3780(3) 0.6904(3) 0.0931(9) Uani 1 1 d . . .
O3 O 1.2430(3) 0.5820(2) 0.85169(15) 0.0532(5) Uani 1 1 d . . .
O2W O 1.3862(4) 0.3661(3) 0.7551(2) 0.0776(7) Uani 1 1 d . . .
O4 O 1.0569(2) 1.09772(18) 0.78524(13) 0.0445(4) Uani 1 1 d . . .
O3W O 1.1460(6) 1.3275(4) 0.6434(3) 0.1290(15) Uani 1 1 d . . .
O5 O 0.8398(2) 1.07820(19) 0.89651(13) 0.0476(4) Uani 1 1 d . . .
O4W O 0.8830(10) 1.5394(6) 0.5534(5) 0.0970(18) Uani 0.50 1 d P . .
O5W O 0.5185(3) 1.0638(2) 0.8401(2) 0.0722(7) Uani 1 1 d . . .
H2NA H 0.425(4) 0.914(3) 0.908(2) 0.050(8) Uiso 1 1 d . . .
H2NB H 0.315(4) 0.837(3) 0.890(3) 0.054(8) Uiso 1 1 d . . .
H2NC H 0.304(5) 0.880(4) 0.980(3) 0.069(11) Uiso 1 1 d . . .
 
loop_
 _atom_site_aniso_label
 _atom_site_aniso_U_11
 _atom_site_aniso_U_22
 _atom_site_aniso_U_33
 _atom_site_aniso_U_23
 _atom_site_aniso_U_13
 _atom_site_aniso_U_12
C1 0.0361(11) 0.0475(13) 0.0384(10) -0.0027(9) 0.0010(9) -0.0083(10)
C2 0.0530(16) 0.0521(15) 0.0574(15) 0.0015(12) -0.0030(13) -0.0044(12)
C3 0.0457(15) 0.0697(19) 0.0523(14) 0.0117(14) -0.0084(12) -0.0060(13)
C4 0.0429(14) 0.093(2) 0.0394(12) 0.0036(13) -0.0087(10) -0.0202(14)
C5 0.0444(13) 0.0714(18) 0.0339(10) -0.0041(11) -0.0035(9) -0.0208(12)
C6 0.0316(10) 0.0533(13) 0.0315(9) -0.0048(9) 0.0008(8) -0.0136(9)
C7 0.0388(11) 0.0422(11) 0.0337(9) -0.0102(8) 0.0000(8) -0.0151(9)
C8 0.0336(10) 0.0342(10) 0.0349(9) -0.0088(8) -0.0005(8) -0.0091(8)
C9 0.0309(10) 0.0451(12) 0.0352(9) -0.0073(9) 0.0004(8) -0.0122(9)
C10 0.0383(11) 0.0350(10) 0.0439(10) -0.0091(9) -0.0017(9) -0.0145(9)
C11 0.0398(11) 0.0448(12) 0.0414(10) -0.0125(9) 0.0024(9) -0.0197(10)
C12 0.0388(12) 0.0433(12) 0.0514(12) -0.0037(10) 0.0010(10) -0.0170(10)
C13 0.0442(13) 0.0610(15) 0.0401(11) -0.0030(10) 0.0033(10) -0.0199(11)
C14 0.0418(12) 0.0345(10) 0.0385(10) -0.0096(8) -0.0029(9) -0.0114(9)
C15 0.0687(18) 0.0530(15) 0.0531(13) -0.0227(12) 0.0056(13) -0.0294(14)
Cu1 0.03666(16) 0.03666(15) 0.03461(14) -0.01060(10) 0.00003(10) -0.01314(11)
N1 0.0334(8) 0.0352(9) 0.0313(7) -0.0074(7) -0.0003(7) -0.0118(7)
N2 0.0355(10) 0.0557(13) 0.0423(10) -0.0152(9) 0.0011(8) -0.0188(9)
O1 0.0531(10) 0.0368(8) 0.0520(9) -0.0104(7) -0.0084(8) -0.0051(7)
O2 0.0375(8) 0.0457(9) 0.0401(7) -0.0099(7) -0.0072(6) -0.0138(7)
O1W 0.0848(18) 0.0659(16) 0.128(2) -0.0425(16) -0.0060(17) -0.0075(13)
O3 0.0474(10) 0.0484(10) 0.0553(10) -0.0006(8) -0.0181(8) -0.0080(8)
O2W 0.0802(16) 0.0613(14) 0.0895(17) -0.0186(12) -0.0082(13) -0.0177(12)
O4 0.0495(9) 0.0465(9) 0.0466(8) -0.0207(7) 0.0081(7) -0.0223(8)
O3W 0.152(3) 0.130(3) 0.116(3) 0.025(2) -0.040(2) -0.089(3)
O5 0.0456(9) 0.0556(10) 0.0481(9) -0.0169(8) 0.0047(7) -0.0227(8)
O4W 0.142(6) 0.075(3) 0.079(3) -0.015(3) 0.003(3) -0.044(4)
O5W 0.0548(12) 0.0550(12) 0.1036(18) -0.0016(12) -0.0072(12) -0.0250(10)
 
_geom_special_details
;
 All s.u.'s (except the s.u. in the dihedral angle between two l.s. planes)
 are estimated using the full covariance matrix.  The cell s.u.'s are taken
 into account individually in the estimation of s.u.'s in distances, angles
 and torsion angles; correlations between s.u.'s in cell parameters are only
 used when they are defined by crystal symmetry.  An approximate (isotropic)
 treatment of cell s.u.'s is used for estimating s.u.'s involving l.s. planes.
;
 
loop_
 _geom_bond_atom_site_label_1
 _geom_bond_atom_site_label_2
 _geom_bond_distance
 _geom_bond_site_symmetry_2
 _geom_bond_publ_flag
C1 O1 1.323(3) . ?
C1 C6 1.401(4) . ?
C1 C2 1.416(4) . ?
C2 C3 1.379(5) . ?
C2 H2 0.9300 . ?
C3 C4 1.378(5) . ?
C3 H3 0.9300 . ?
C4 C5 1.361(4) . ?
C4 H4 0.9300 . ?
C5 C6 1.424(3) . ?
C5 H5 0.9300 . ?
C6 C7 1.445(3) . ?
C7 N1 1.283(3) . ?
C7 H7 0.9300 . ?
C8 N1 1.475(3) . ?
C8 C10 1.533(3) . ?
C8 C9 1.533(3) . ?
C8 H8 0.9800 . ?
C9 O3 1.230(3) . ?
C9 O2 1.277(3) . ?
C10 C11 1.524(3) . ?
C10 H10A 0.9700 . ?
C10 H10B 0.9700 . ?
C11 C12 1.523(3) . ?
C11 H11A 0.9700 . ?
C11 H11B 0.9700 . ?
C12 C13 1.508(4) . ?
C12 H12A 0.9700 . ?
C12 H12B 0.9700 . ?
C13 N2 1.495(3) . ?
C13 H13A 0.9700 . ?
C13 H13B 0.9700 . ?
C14 O5 1.248(3) . ?
C14 O4 1.269(3) . ?
C14 C15 1.507(3) . ?
C15 H15A 0.9600 . ?
C15 H15B 0.9600 . ?
C15 H15C 0.9600 . ?
Cu1 O1 1.8976(17) . ?
Cu1 N1 1.9159(19) . ?
Cu1 O4 1.9502(17) . ?
Cu1 O2 1.9604(16) . ?
N2 H2NA 0.91(3) . ?
N2 H2NB 0.90(4) . ?
N2 H2NC 0.84(4) . ?
 
loop_
 _geom_angle_atom_site_label_1
 _geom_angle_atom_site_label_2
 _geom_angle_atom_site_label_3
 _geom_angle
 _geom_angle_site_symmetry_1
 _geom_angle_site_symmetry_3
 _geom_angle_publ_flag
O1 C1 C6 124.4(2) . . ?
O1 C1 C2 118.4(3) . . ?
C6 C1 C2 117.3(3) . . ?
C3 C2 C1 121.2(3) . . ?
C3 C2 H2 119.4 . . ?
C1 C2 H2 119.4 . . ?
C4 C3 C2 121.0(3) . . ?
C4 C3 H3 119.5 . . ?
C2 C3 H3 119.5 . . ?
C5 C4 C3 119.7(3) . . ?
C5 C4 H4 120.2 . . ?
C3 C4 H4 120.2 . . ?
C4 C5 C6 120.8(3) . . ?
C4 C5 H5 119.6 . . ?
C6 C5 H5 119.6 . . ?
C1 C6 C5 120.0(2) . . ?
C1 C6 C7 123.6(2) . . ?
C5 C6 C7 116.4(2) . . ?
N1 C7 C6 124.5(2) . . ?
N1 C7 H7 117.8 . . ?
C6 C7 H7 117.8 . . ?
N1 C8 C10 111.44(17) . . ?
N1 C8 C9 108.26(18) . . ?
C10 C8 C9 109.36(17) . . ?
N1 C8 H8 109.2 . . ?
C10 C8 H8 109.2 . . ?
C9 C8 H8 109.2 . . ?
O3 C9 O2 123.9(2) . . ?
O3 C9 C8 119.4(2) . . ?
O2 C9 C8 116.70(19) . . ?
C11 C10 C8 114.33(18) . . ?
C11 C10 H10A 108.7 . . ?
C8 C10 H10A 108.7 . . ?
C11 C10 H10B 108.7 . . ?
C8 C10 H10B 108.7 . . ?
H10A C10 H10B 107.6 . . ?
C12 C11 C10 111.8(2) . . ?
C12 C11 H11A 109.3 . . ?
C10 C11 H11A 109.3 . . ?
C12 C11 H11B 109.3 . . ?
C10 C11 H11B 109.3 . . ?
H11A C11 H11B 107.9 . . ?
C13 C12 C11 114.5(2) . . ?
C13 C12 H12A 108.6 . . ?
C11 C12 H12A 108.6 . . ?
C13 C12 H12B 108.6 . . ?
C11 C12 H12B 108.6 . . ?
H12A C12 H12B 107.6 . . ?
N2 C13 C12 113.1(2) . . ?
N2 C13 H13A 108.9 . . ?
C12 C13 H13A 108.9 . . ?
N2 C13 H13B 108.9 . . ?
C12 C13 H13B 108.9 . . ?
H13A C13 H13B 107.8 . . ?
O5 C14 O4 123.0(2) . . ?
O5 C14 C15 120.1(2) . . ?
O4 C14 C15 116.9(2) . . ?
C14 C15 H15A 109.5 . . ?
C14 C15 H15B 109.5 . . ?
H15A C15 H15B 109.5 . . ?
C14 C15 H15C 109.5 . . ?
H15A C15 H15C 109.5 . . ?
H15B C15 H15C 109.5 . . ?
O1 Cu1 N1 94.14(8) . . ?
O1 Cu1 O4 91.34(8) . . ?
N1 Cu1 O4 174.04(8) . . ?
O1 Cu1 O2 178.07(7) . . ?
N1 Cu1 O2 83.97(7) . . ?
O4 Cu1 O2 90.57(7) . . ?
C7 N1 C8 119.42(19) . . ?
C7 N1 Cu1 126.16(16) . . ?
C8 N1 Cu1 114.18(13) . . ?
C13 N2 H2NA 113.7(19) . . ?
C13 N2 H2NB 111(2) . . ?
H2NA N2 H2NB 107(3) . . ?
C13 N2 H2NC 112(2) . . ?
H2NA N2 H2NC 104(3) . . ?
H2NB N2 H2NC 108(3) . . ?
C1 O1 Cu1 126.24(16) . . ?
C9 O2 Cu1 115.89(14) . . ?
C14 O4 Cu1 113.94(15) . . ?
 
loop_
 _geom_torsion_atom_site_label_1
 _geom_torsion_atom_site_label_2
 _geom_torsion_atom_site_label_3
 _geom_torsion_atom_site_label_4
 _geom_torsion
 _geom_torsion_site_symmetry_1
 _geom_torsion_site_symmetry_2
 _geom_torsion_site_symmetry_3
 _geom_torsion_site_symmetry_4
 _geom_torsion_publ_flag
O1 C1 C2 C3 179.0(3) . . . . ?
C6 C1 C2 C3 -0.4(4) . . . . ?
C1 C2 C3 C4 -0.4(5) . . . . ?
C2 C3 C4 C5 0.7(4) . . . . ?
C3 C4 C5 C6 -0.2(4) . . . . ?
O1 C1 C6 C5 -178.5(2) . . . . ?
C2 C1 C6 C5 0.8(3) . . . . ?
O1 C1 C6 C7 4.2(4) . . . . ?
C2 C1 C6 C7 -176.5(2) . . . . ?
C4 C5 C6 C1 -0.6(4) . . . . ?
C4 C5 C6 C7 177.0(2) . . . . ?
C1 C6 C7 N1 -0.1(3) . . . . ?
C5 C6 C7 N1 -177.6(2) . . . . ?
N1 C8 C9 O3 -170.49(19) . . . . ?
C10 C8 C9 O3 67.9(3) . . . . ?
N1 C8 C9 O2 11.0(3) . . . . ?
C10 C8 C9 O2 -110.6(2) . . . . ?
N1 C8 C10 C11 -59.4(2) . . . . ?
C9 C8 C10 C11 60.2(2) . . . . ?
C8 C10 C11 C12 -177.60(19) . . . . ?
C10 C11 C12 C13 179.4(2) . . . . ?
C11 C12 C13 N2 71.1(3) . . . . ?
C6 C7 N1 C8 176.85(19) . . . . ?
C6 C7 N1 Cu1 -9.2(3) . . . . ?
C10 C8 N1 C7 -74.6(2) . . . . ?
C9 C8 N1 C7 165.09(19) . . . . ?
C10 C8 N1 Cu1 110.76(17) . . . . ?
C9 C8 N1 Cu1 -9.5(2) . . . . ?
O1 Cu1 N1 C7 11.3(2) . . . . ?
O4 Cu1 N1 C7 -145.3(6) . . . . ?
O2 Cu1 N1 C7 -169.07(19) . . . . ?
O1 Cu1 N1 C8 -174.49(14) . . . . ?
O4 Cu1 N1 C8 28.9(7) . . . . ?
O2 Cu1 N1 C8 5.14(14) . . . . ?
C6 C1 O1 Cu1 1.6(3) . . . . ?
C2 C1 O1 Cu1 -177.67(19) . . . . ?
N1 Cu1 O1 C1 -7.5(2) . . . . ?
O4 Cu1 O1 C1 170.1(2) . . . . ?
O2 Cu1 O1 C1 -18(2) . . . . ?
O3 C9 O2 Cu1 174.13(18) . . . . ?
C8 C9 O2 Cu1 -7.5(2) . . . . ?
O1 Cu1 O2 C9 12(2) . . . . ?
N1 Cu1 O2 C9 1.39(15) . . . . ?
O4 Cu1 O2 C9 -176.22(16) . . . . ?
O5 C14 O4 Cu1 1.0(3) . . . . ?
C15 C14 O4 Cu1 179.52(17) . . . . ?
O1 Cu1 O4 C14 93.98(17) . . . . ?
N1 Cu1 O4 C14 -109.3(6) . . . . ?
O2 Cu1 O4 C14 -85.73(17) . . . . ?
 
_diffrn_measured_fraction_theta_max    0.973
_diffrn_reflns_theta_full              32.47
_diffrn_measured_fraction_theta_full   0.973
_refine_diff_density_max    0.639
_refine_diff_density_min   -0.579
_refine_diff_density_rms    0.074
